# Supplementary material
Source: publisher site journal article supplement (https://study.sagepub.com/sites/default/files/phillips_kelly_2e_appendix_2b.doc)
Supplement: Supplementary file 1 [file phillips_kelly_2e_appendix_2b.doc]

Appendix 2(b) Assessment of Auditory Discrimination

**Name: Date of assessment:**

**Date of birth: Chronological age:**

**Auditory Discrimination Instructions:**

**Note:**

The learner should face away from you so that there are no visual clues. (It is usual to stand **behind** the learner when giving this test.) Care should be taken not to emphasise particular phonemes where there are differences.

Say, ‘I’m going to say two words to you and I want you to tell me if you hear two different words like “house” and “mouse” or two words that are the same said twice like “pan” and “pan”.

**Practice item:**

Say, ‘Are these words the same or are they different: “flap”, “clap”.’ (The learner can say, ‘same or different’ or ‘yes’ for same and ‘no’ for different.)

| Stimulus words | Learner’s response |
| --- | --- |
| rag / bag |  |
| gate / cake |  |
| sun / sun |  |
| tap / pat |  |
| nip / pin |  |
| kind / kind |  |
| sit / sit |  |
| mug / hug |  |
| chip / ship |  |
| tin / tan |  |
| no / no |  |
| step / stop |  |
| bog / dog |  |
| in / on |  |
| trip / trap |  |

**Scores:** Number correct ***Same*** /4

Number correct ***Different***  /11

Total correct /15

**Note any particular difficulties.**

**Photocopiable**

*Assessment of Learners with Dyslexic-Type Difficulties 2e* © 2018 Sylvia Phillips and Kathleen Kelly (Sage: London).
